# Supplementary material for: GSK461364A, a Polo-Like Kinase-1 Inhibitor Encapsulated in Polymeric Nanoparticles for the Treatment of Glioblastoma Multiforme (GBM)
Source: Bioengineering (Basel). 2018 Oct 9;5(4):83. doi: 10.3390/bioengineering5040083 (PMC6315921; doi:10.3390/bioengineering5040083)
Supplement: Supplementary file 1 [file bioengineering-05-00083-s001.pdf]

## Supplementary Information:

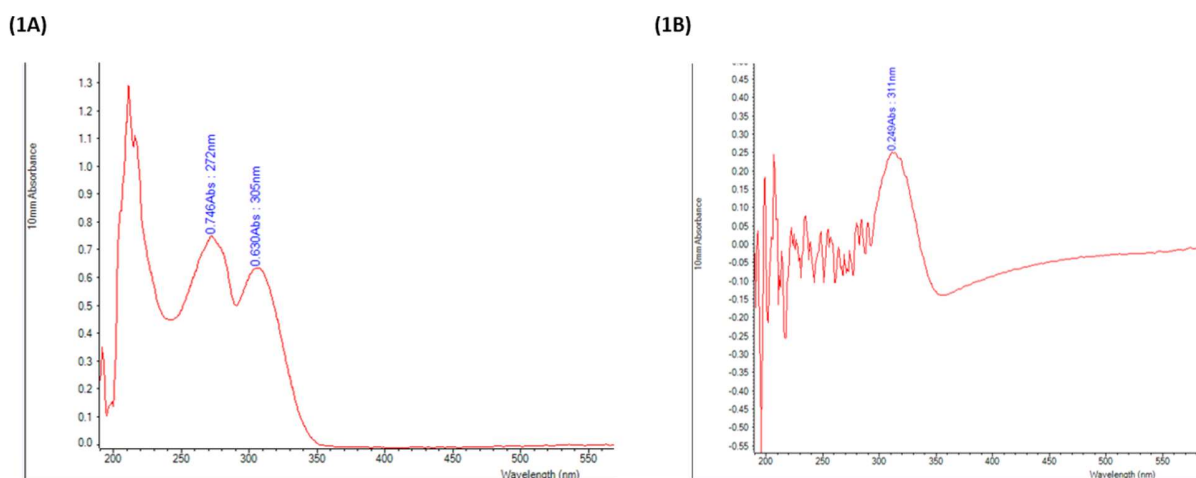

**Figure S1.** UV spectrum of GSK461364. (1A) Maximum wavelength ( $\lambda_{\text{max}}$ ) observed at 272 nm and 305 nm when dissolved in ethanol (1B)  $\lambda_{\text{max}}$  observed at 311 nm when the drug is dissolved in 1% triton-x solution.

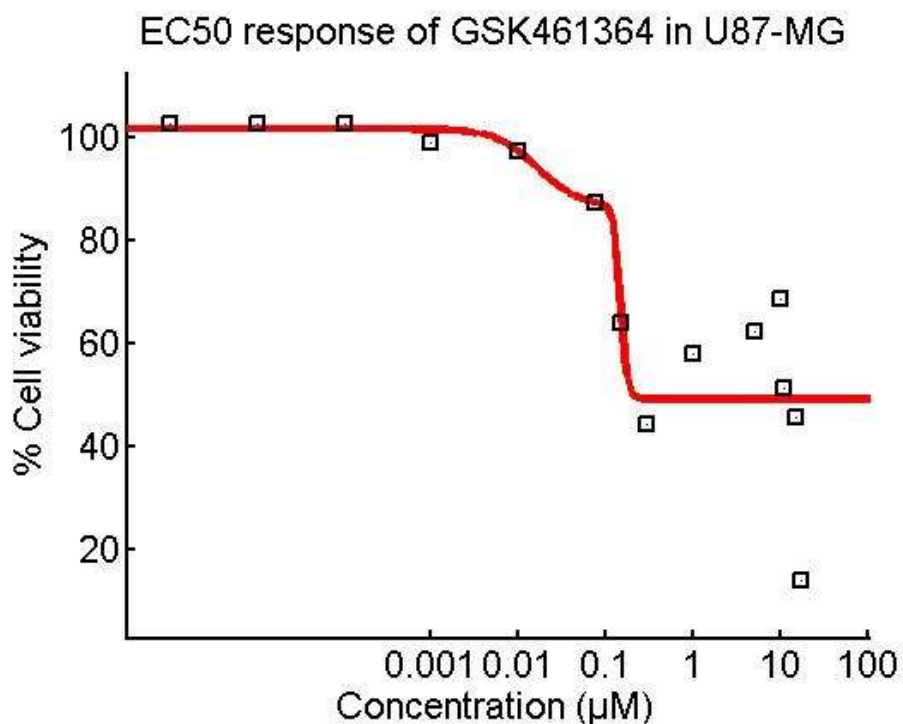

**Figure S2.** EC50 curve of GSK461364 in U87-MG cell line: The graph plots % cell viability on the Y-axis when dosed with concentrations (X-axis) from 1 picomolar to 17  $\mu\text{M}$  of GSK. Fit was done using dose-response simulation in Dr Fit© using the biphasic fitting type with two inflexion points.
